# Supplementary material for: Epidemiology and Molecular Analyses of Influenza B Viruses in Senegal from 2010 to 2019
Source: MDPI journal article supplement (doi:10.3390/v14051063), 2022-05-16

**Supplementary Figure S1:** Alignment of the amino acid sequences of HA gene (B/Vic) of twelve Senegalese strains that circulated in 2018 and 2019. Vaccine strain B/Brisbane/60/2008 was used as reference strains. Deletion in HA gene are indicated in the orange box.

|                                |              |            |              |            |            |            |            |            |            |            |            |   |
|--------------------------------|--------------|------------|--------------|------------|------------|------------|------------|------------|------------|------------|------------|---|
| [                              | 1111111111   | 1111111111 | 1111111111   | 1111111111 | 1111111111 | 1111111111 | 1111111111 | 1111111111 | 1111111111 | 1111111111 | 1111111112 | ] |
| [                              | 0000000001   | 1111111112 | 2222222223   | 3333333334 | 4444444445 | 5555555556 | 6666666667 | 7777777778 | 8888888889 | 9999999990 |            | ] |
| [                              | 1234567890   | 1234567890 | 1234567890   | 1234567890 | 1234567890 | 1234567890 | 1234567890 | 1234567890 | 1234567890 | 1234567890 | 1234567890 | ] |
| #B/Brisbane/60/2008 2008-04-08 | KIP SARV SIL | HEVRPVTSGC | FPI MHDR TKI | RQLPNLLRGY | EHVRLSTHNV | INAENAPGGP | YKIGTSGSCP | NITNGNGFFA | TMAWAVPKND | KN         | KTATNPLT   |   |
| #B/Dakar/17/2018 2018-10-08    | KIP SARV SIL | HEVRPVTSGC | FPI MHDR TKI | RQLPNLLRGY | EHVRLSTHNV | INAEDAPGGP | YEIGTSGSCP | NITNGNGFFA | TMAWAVPKN  | --         | KTATNPLT   |   |
| #B/SENEGAL/01/2018 2018-01-23  | KIP SARV SIL | HEVRPVTSGC | FPI MHDR TKI | RQLPNLLRGY | EHVRLSTHNV | INAEDAPGGP | YKIGTSGSCP | NITNGNGFFA | TMAWAVPKND | KN         | KTATNPLT   |   |
| #B/SENEGAL/02/2018 2018-09-24  | KIP SARV SIL | HEVRPVTSGC | FPI MHDR TKI | RQLPNLLRGY | EHVRLSTHNV | INAEDAPGGP | YEIGTSGSCP | NITNGNGFFA | TMAWAVPKN  | --         | KTATNPLT   |   |
| #B/SENEGAL/03/2018 2018-10-01  | KIP SARV SIL | HEVRPVTSGC | FPI MHDR TKI | RQLPNLLRGY | EHVRLSTHNV | INAEDAPGGP | YEIGTSGSCP | NITNGNGFFA | TMAWAVPKN  | --         | KTATNPLT   |   |
| #B/SENEGAL/04/2018 2018-10-08  | KIP SARV SIL | HEVRPVTSGC | FPI MHDR TKI | RQLPNLLRGY | EHVRLSTHNV | INAEDAPGGP | YEIGTSGSCP | NITNGNGFFA | TMAWAVPKN  | --         | KTATNPLT   |   |
| #B/SENEGAL/05/2018 2018-10-17  | KIP SARV SIL | HEVRPVTSGC | FPI MHDR TKI | RQLPNLLRGY | EHVRLSTHNV | INAEDAPGGP | YEIGTSGSCP | NITNGNGFFA | TMAWAVPKN  | --         | KTATNPLT   |   |
| #B/SENEGAL/06/2018 2018-10-22  | KIP SARV SIL | HEVRPVTSGC | FPI MHDR TKI | RQLPNLLRGY | EHVRLSTHNV | INAEDAPGGP | YEIGTSGSCP | NITNGNGFFA | TMAWAVPKN  | --         | KTATNPLT   |   |
| #B/SENEGAL/07/2018 2018-10-22  | KIP SARV SIL | HEVRPVTSGC | FPI MHDR TKI | RQLPNLLRGY | EHVRLSTHNV | INAENAPGRP | YEIGTSGSCP | NITNGNGFFA | TMAWAVPKN  | --         | KTATNPLT   |   |
| #B/Dakar/02/2019 2019-01-08    | KIP SARV SIL | HEVRPVTSGC | FPI MHDR TKI | RQLPNLLRGY | EHVRLSTHNV | INAEDAPGRP | YEIGTSGSCP | NITNGNGFFA | TMAWAVPKN  | --         | KTATNPLT   |   |
| #B/Dakar/06/2019 2019-02-22    | KIP SARV SIL | HEVRPVTSGC | FPI MHDR TKI | RQLPNLLRGY | EHVRLSTHNV | INAEDAPGRP | YEIGTSGSCP | NITNGNGFFA | TMAWAVPKN  | --         | KTATNPLT   |   |
| #B/Dakar/08/2019 2019-03-21    | KIP SARV SIL | HEVRPVTSGC | FPI MHDR TKI | RQLPNLLRGY | EHVRLSTHNV | INAEDAPGRP | YEIGTSGSCP | NITNGNGFFA | TMAWAVPKN  | --         | KTATNPLT   |   |
| #B/Dakar/07/2019 2019-03-04    | KIP SARV SIL | HEVRPVTSGC | FPI MHDR TKI | RQLPNLLRGY | EHVRLSTHNV | INAEDAPGRP | YEIGTSGSCP | NITNGNGFFA | TMAWAVPKN  | --         | KTATNPLT   |   |

**Supplementary Figure S2.** Phylodynamic tree of HA gene for Senegalese circulating strains. The tree was obtained by the Markov Chain Monte Carlo method using the BEAST software. 200,000,000 steps were required and the GTR + G model was used. Strain B/Lee/1940 was used to root the tree. The Senegalese strains are indicated in orange.

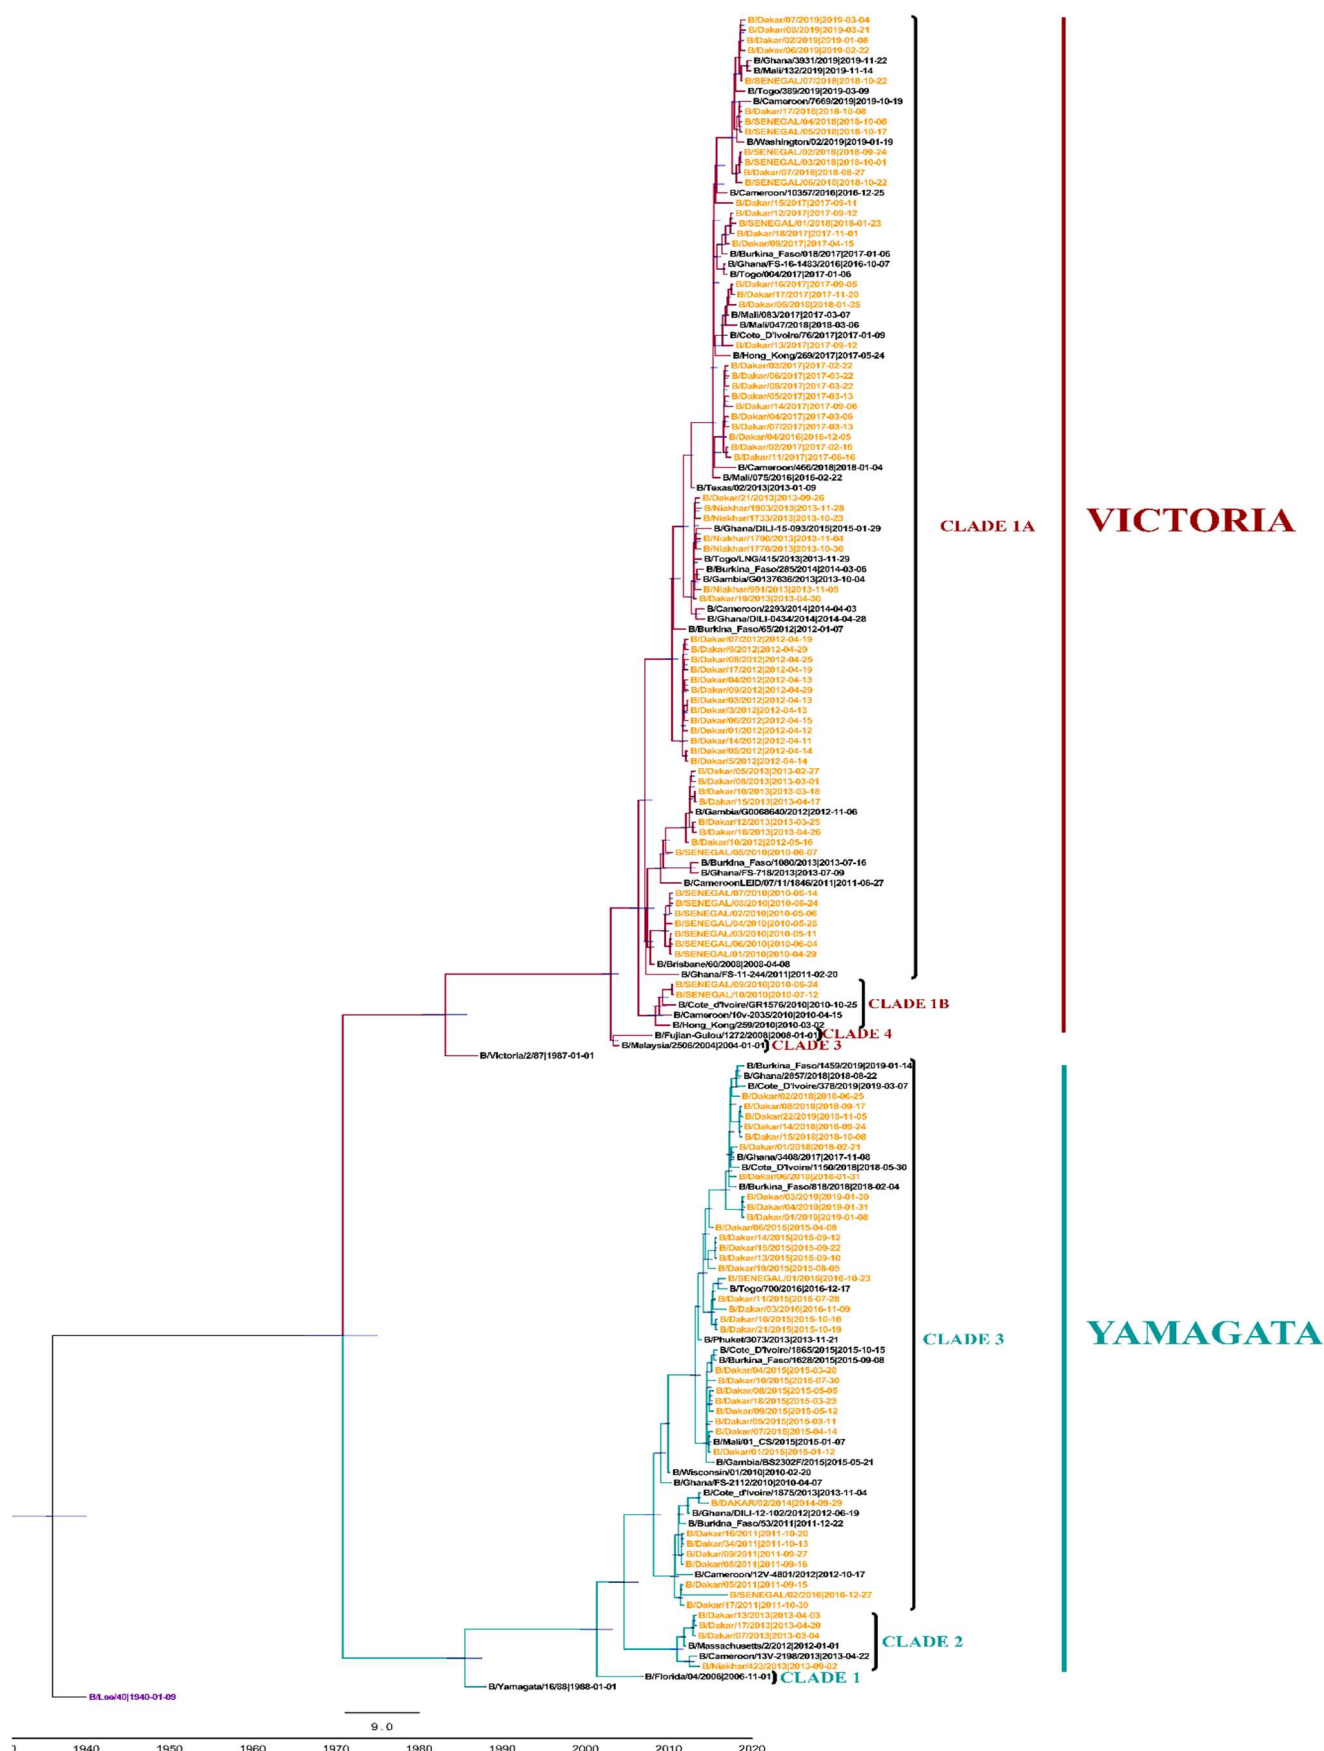

**Supplementary Figure S3.** Phylodynamic tree of HA gene for Senegalese circulating strains. The tree was obtained by the Markov Chain Monte Carlo using the BEAST software. 200,000,000 steps were required and the GTR + G model was used. Strain B/Lee/1940 was used to root the tree. The Senegalese strains are indicated in orange.

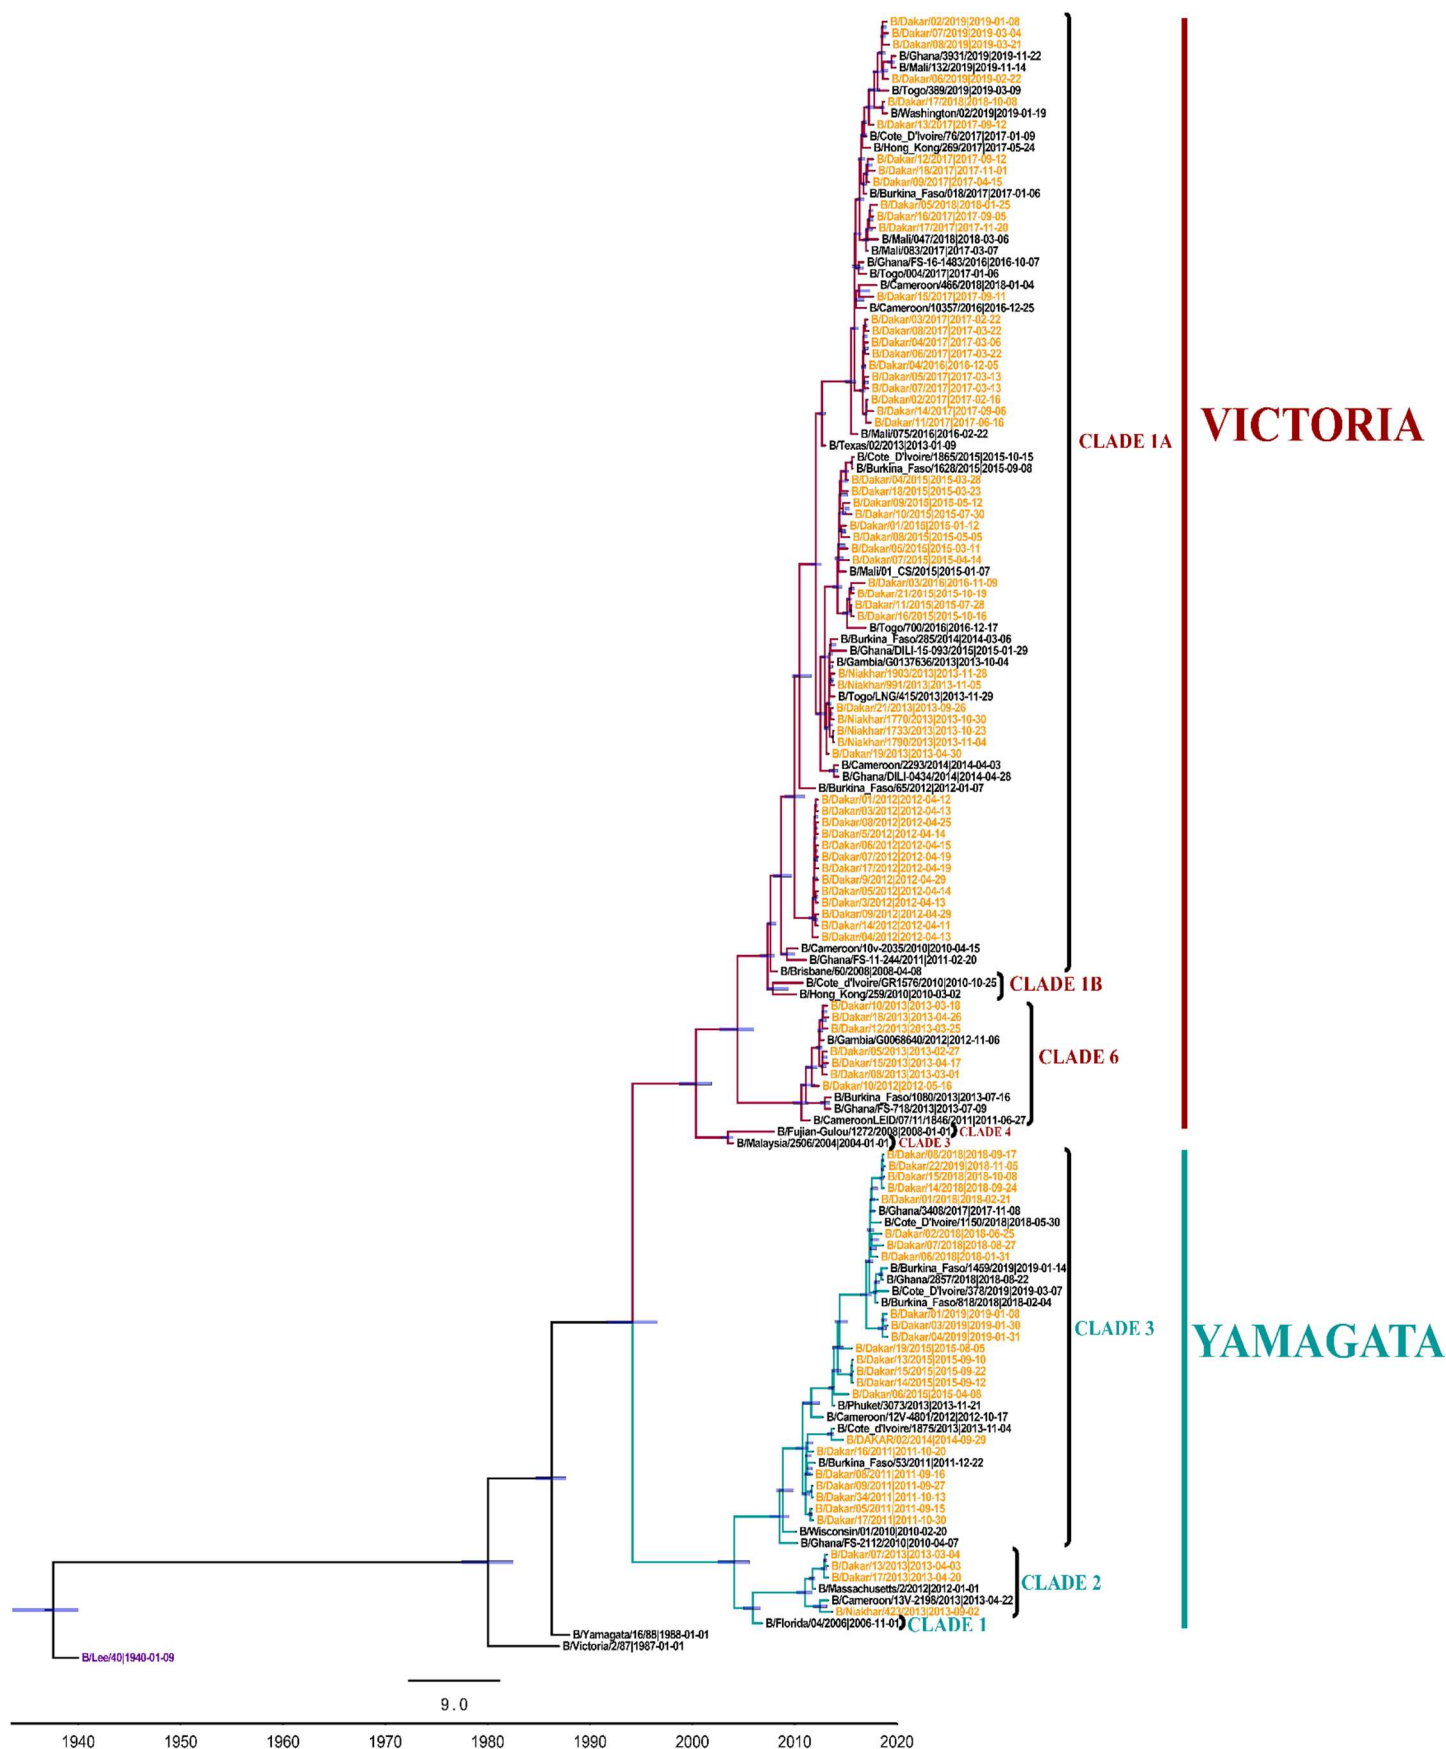

Supplement: s1 [file s1]
